# Supplementary material
Source: publisher figshare collection journal article supplement (https://karger.figshare.com/articles/dataset/_/6269981)
Supplement: Supplementary file 1 [file 1]

Adalimumab 80 mg EOW dosed  
 $n = 28$

Discontinued:  $n = 10$   
Primary reason for discontinuation  
Adverse event:  $n = 3$   
Lack of efficacy:  $n = 6$   
Other:  $n = 1$

Completed week 52 and had  
a 70-day follow-up or initiated  
commercial Humira  
 $n = 18$
